# Supplementary material
Source: PubMed Central journal article supplement (PMC9768284)

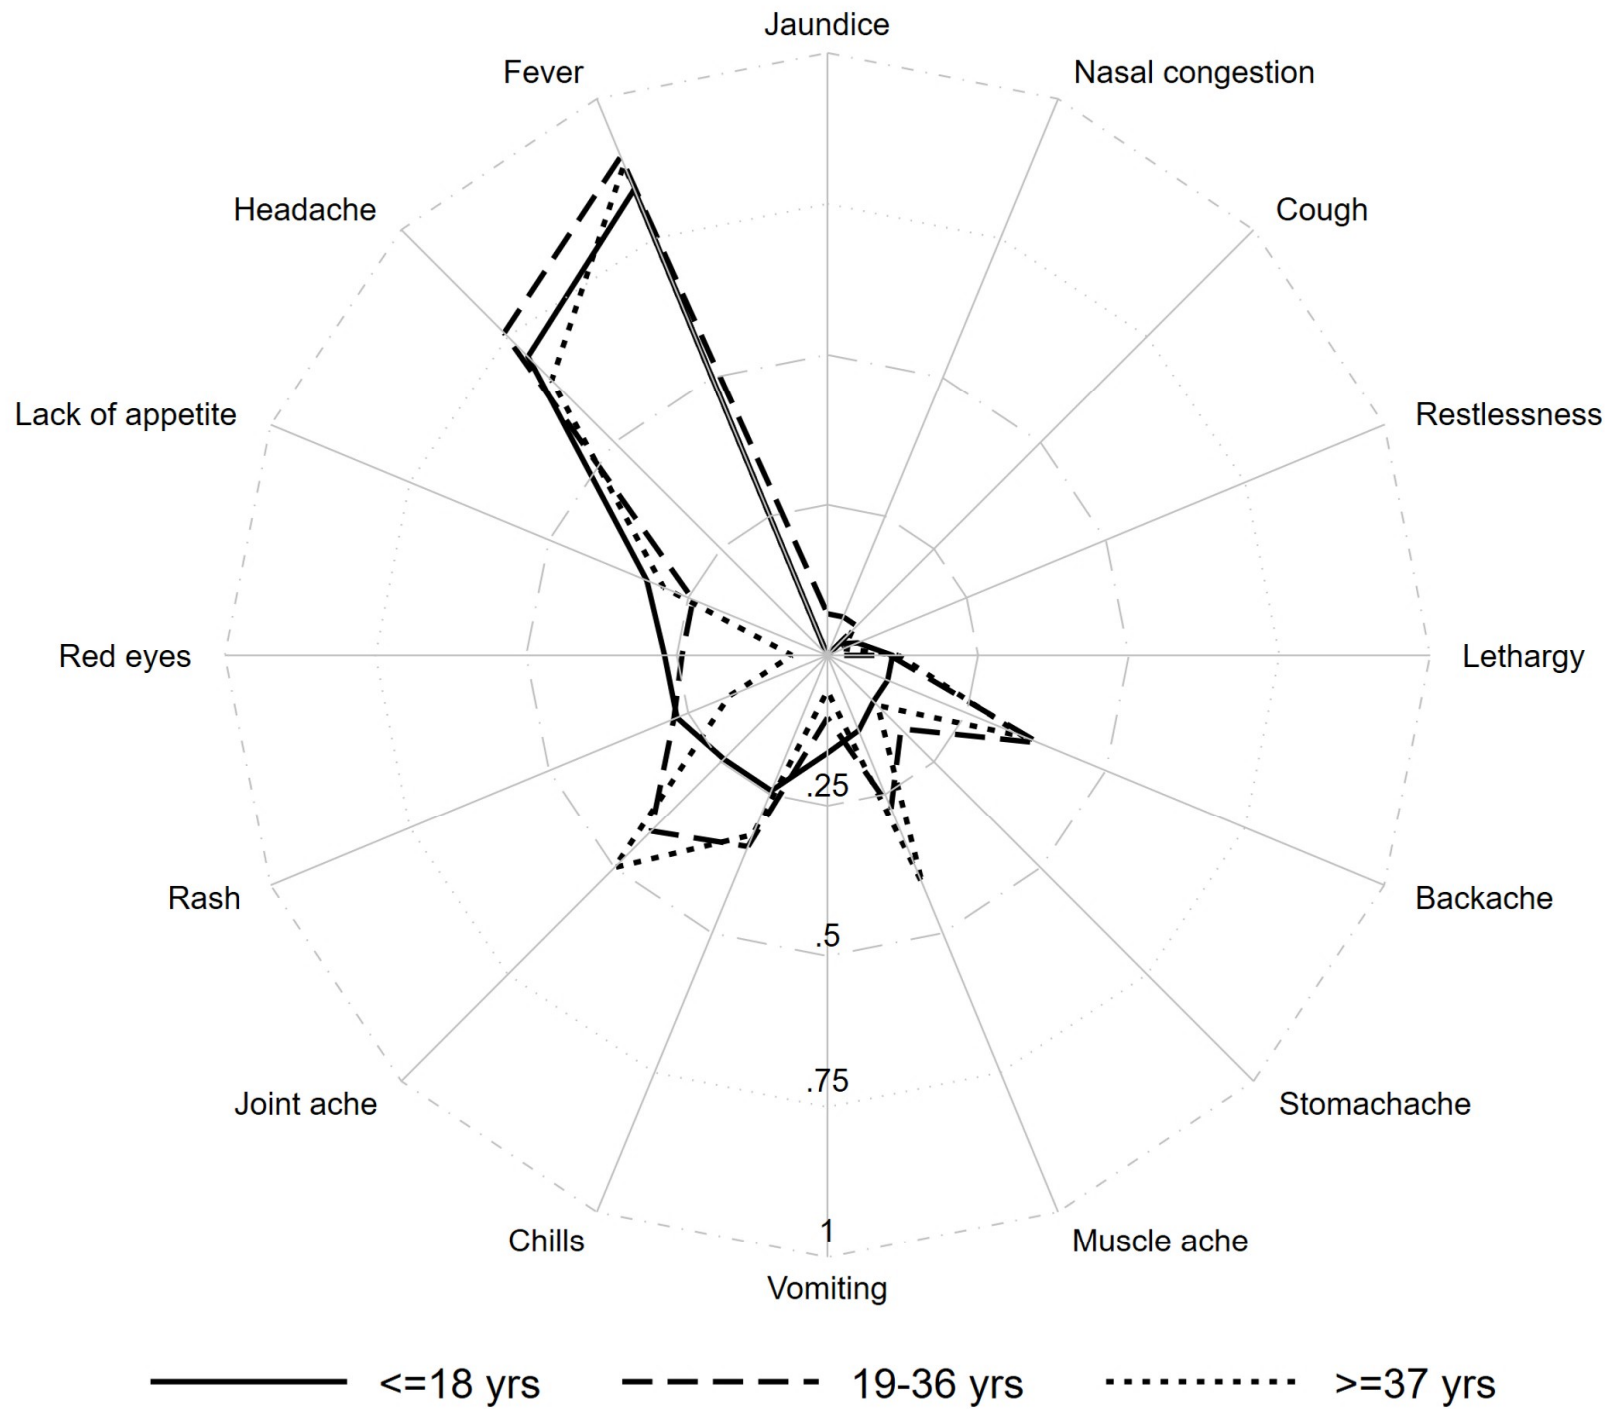

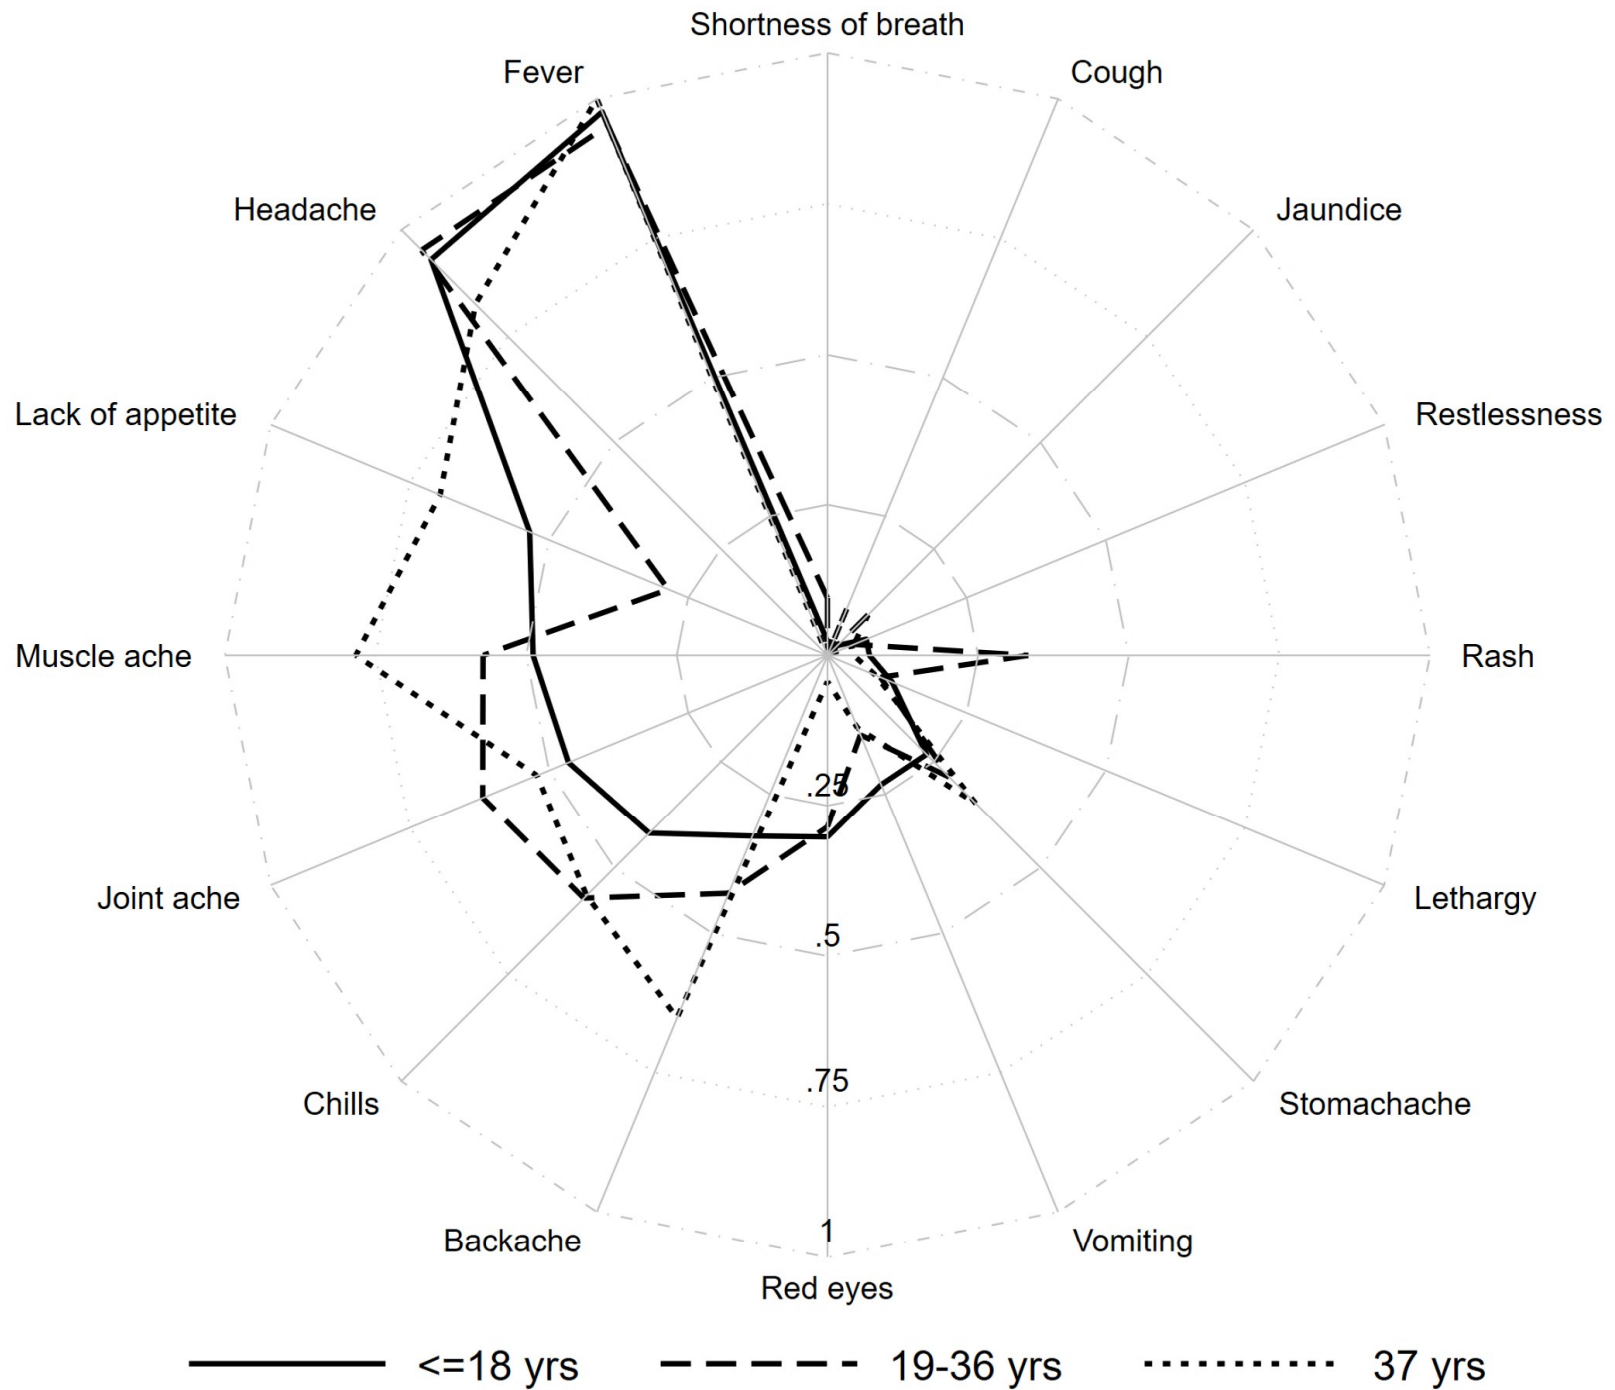

Supplement: tpmd220296.SD1.pdf [file tpmd220296.SD1.pdf]
